# Supplementary material
Source: Springer Nature journal article supplement (https://www.springermedizin.de/resource/supplementary/12889_2009_1954_MOESM2_ESM.pdf/9485450)

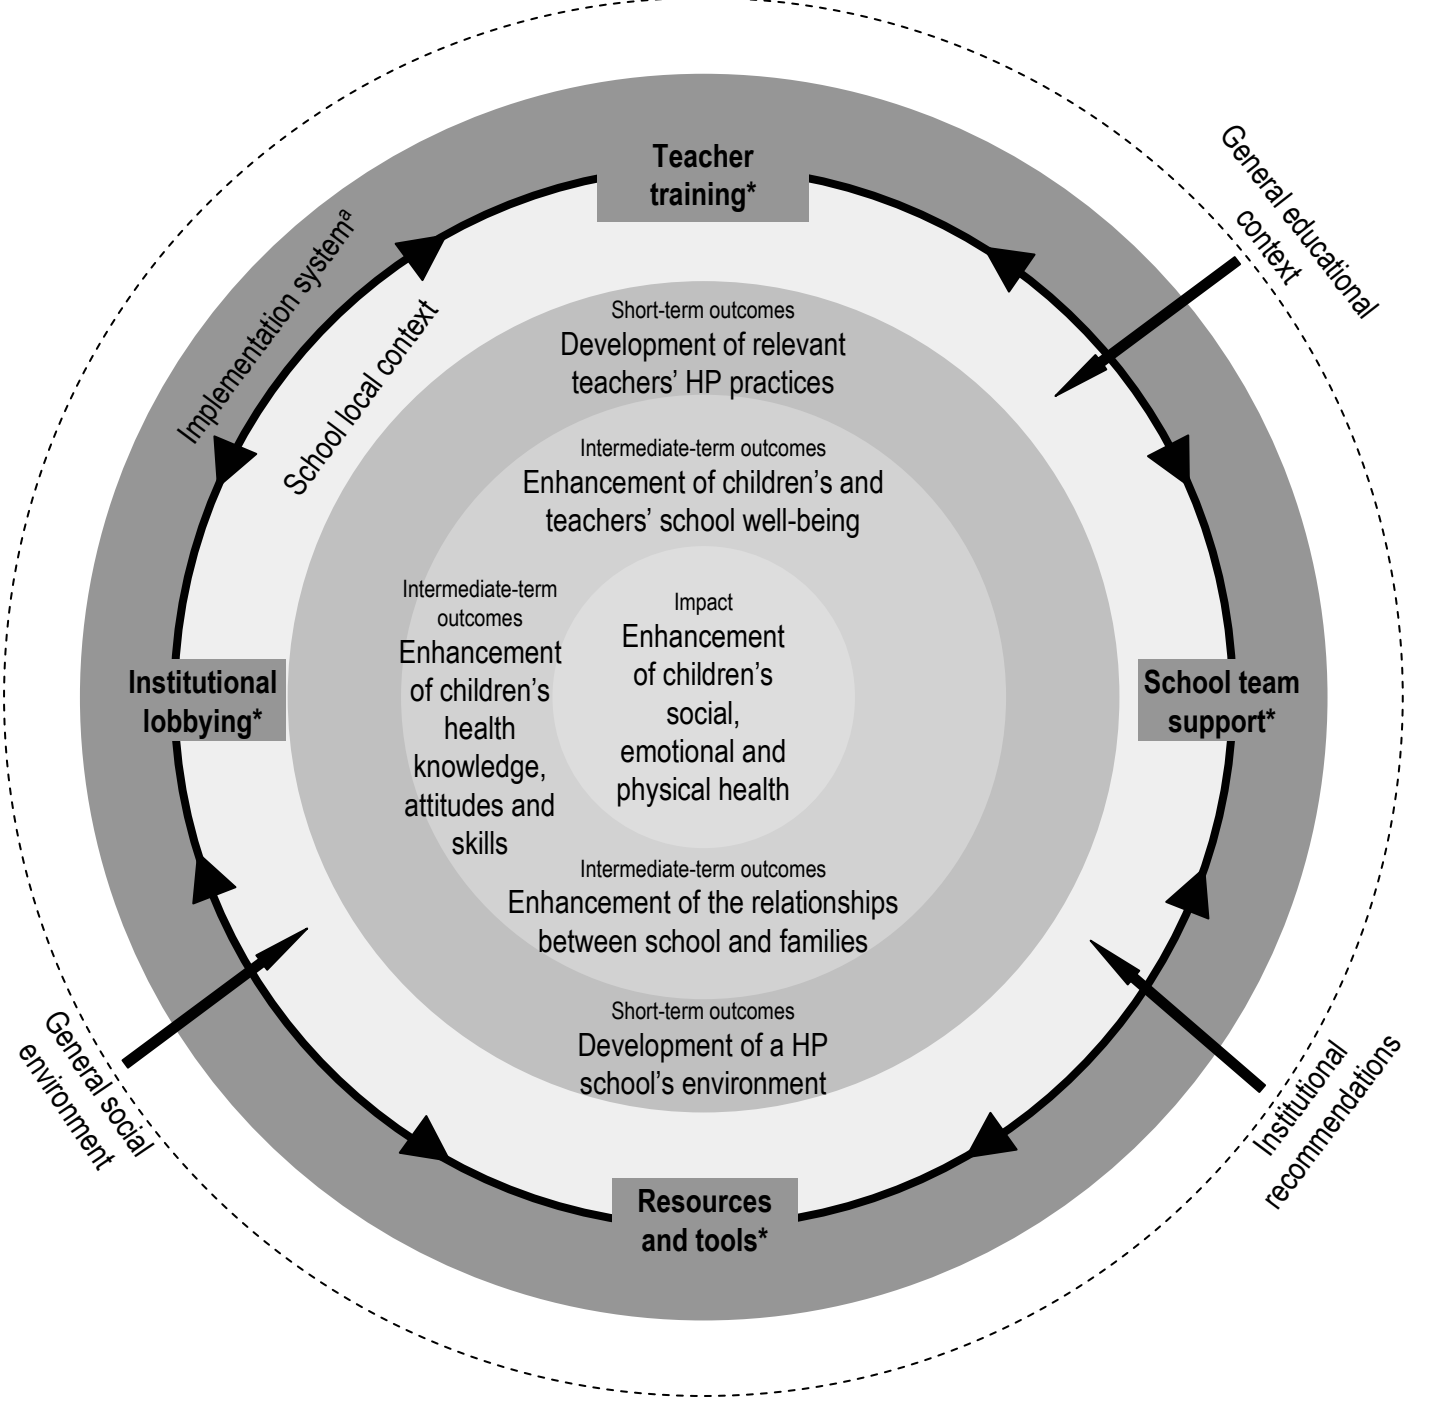

Supplement: MOESM2 [file 9485450]
